# Supplementary material for: Spatially limited mud turbidites on the Cascadia margin: segmented earthquake ruptures?
Source: Copernicus journal article supplement (doi:10.5194/nhess-13-2109-2013), 2013-08-23
Supplement: Supplementary file 1 [file Electronic Supplement to NHESS.docx]

Electronic Supplement to: Spatially Limited Mud Turbidites on the Cascadia Margin: Segmented Earthquake Ruptures?

### 1.0 Spatially Limited Turbidites at Other Cascadia Sites

Goldfinger et al. (2012) conclude that of the 22 turbidites at Rogue Apron (modified here to 23) that do not correlate regionally, 12 of them are tentatively correlated to Hydrate Ridge, and therefore if correct, ~ 10 beds terminate between Rogue Apron and Hydrate Ridge. Of these 12 beds, only 3-4 are observed and tentatively correlated to Astoria Channel cores, thus 8-9 beds likely terminate between Hydrate Ridge and Astoria Canyon. Here we offer some additional observations and discussions of the possibility of additional thin beds at northern Cascadia sites. Our primary cores in northern Cascadia are at Juan de Fuca Channel (JDF), Barkley Canyon, and Willapa Channel. Cascadia Channel also monitors the northern Cascadia margin, albeit at a very distal location (Main Text **Fig. 1**). We also utilize older University of Washington cores originally published in Barnard (1973) and Carson (1971).

#### 1.1 Barkley Channel

In Barkley Channel, Goldfinger et al. (2012) interpret the upper four thin silt-mud turbidites as likely to correlate to regional beds T1-T4, and observe that Barkley Canyon upstream may have been recently blocked temporarily by a reverse fault scarp across the channel thalweg. Alternatively, these beds could be local, as age control is lacking, and the physical property signatures are subdued and not diagnostic for the purposes of correlation. Barkley cores M9907-08 and 09 PC/TC contain a turbidite stratigraphy that is interpreted to correlate regionally, with several exceptions discussed in Goldfinger et al. (2012). We observe that several other thin mud beds are also present in these cores. One thin wispy bed is found between T5 and T6 in 08 and 09 PC at 60 cm depth in both cores. The core has a dessication crack across this bed, a common feature in the cores after years of storage. These breaks typically occur at silty beds, which have low tensional cohesion. Between regional T6 and T9, two similar wisps may represent T7 and T8, which are otherwise absent at Barkley Channel (Goldfinger et al., 2012). Similarly, the stratigraphic position of T10 is occupied by only a thin silty wisp in Barkley cores M9907 08 and 09PC. Between T15 and T16, a possible counterpart to the bed at this stratigraphic position in the JDF cores is observed as a thin silt bed in CT imagery; is visible in the core, and has a subdued geophysical signature. This dark wisp appears to have lighter hemipelagic sediment both above and below.

#### 1.2 JDF Channel

The best of these are cores are M9907 11PC/TC and M9907-12PC/TC at JDF Channel. Cores 05PC/TC at the more proximal head of JDF Channel contain partial records that are affected by core sampling disturbance in parts of the section. While the overall section thickness is ~ 50% of the Rogue Apron and Hydrate Ridge, making interpretation of thin beds more difficult, all cores have been imaged with CT with a resolution of 0.5 mm, improving the overall ability to observe subtle features in these cores. CT data at all sites are presented in Goldfinger et al. (2012). In M9907 11PC/TC and M9907-12PC/TC, we observe very limited evidence for thin beds between the regional turbidites. Possible indications include a thin silt lamina at 104 cm in M9907-11TC and 11PC. This bed has apparent thin hemipelagic sediment above it and below it, distinguishing it from the tail of T9, and the base of T8. We do not observe this thin bed in nearby core 12PC or 12TC. Similarly, we observe a thin silt bed in the CT imagery of core M9907 11PC, with a possible counterpart in 12PC between regional beds T11 and T12, a stratigraphic position that has no counterpart at other regional sites. There is one clearly expressed bed in cores M9907 11PC and M9907-12PC between T15 and T16. This bed has well expressed sharp silty base in single-pulse fining upward sequence that are visible in CT imagery, visually in the core, and have robust magnetic and density signatures. This bed appears to be separated from the underlying T16 by 1-3 cm of hemipelagic sediment. We had initially interpreted this bed as part of T16, but the more recently added CT data suggests that it is more likely a separate bed. Lastly, core M9907 12PC has a small mud wisp below T16, but this bed is not apparent in nearby 11PC. We have investigated and CT scanned additional cores on the Washington margin available in the NGDC database and located at Oregon State University. In JDF channel, University of Washington cores TT48- 08PC and 09PC are 25.5 km upstream (north) of our cores M9907-11 and 12PC. Age control is limited to the Mazama ash and the Holocene-Pleistocene faunal and lithologic boundary. We note that the TT48 cores are somewhat expanded compared with the M9907 cores. The Holocene section comprises ~ 480 cm of core, where 25 km downstream, in cores M9907-11PC and 12PC the Holocene section is 250 cm thick. This expanded resolution offers improved examination of subtle features. This core has at a maximum, 7 events that are not regionally correlated. 3-4 of these events are appear uncorrelated to any other core in JDF or other systems, and may result from close proximity of the site to a frontal thrust landslide. Further analysis is in progress.

#### 1.3 Willapa Channel

In Willapa Channel cores M9907-14PC/TC T6 and T8, we observe a diffuse bed most likely corresponding to T7 visible in CT data, and a similar signature at the stratigraphic position of T10 in 14TC. These same beds are not as robust in northern Cascadia basin, and this observation is consistent with observations at Barkley Channel. Core 14PC has no additional information below T13, which is clearly identified as the first Mazama ash-bearing core by its jump in Mazama ash content. Below that level, the turbidite stratigraphy is a series of amalgamated turbidites that are difficult to interpret. Nearby cores 15PC/TC have liquefied sections and have not yet been investigated in detail. We do not observe other northern Cascadia basin turbidites at the Willapa site in cores M9907 14PC/TC and M9907-15PC/TC, however these cores are complicated by moderate core disturbance in the upper 50 cm, corresponding to the stratigraphic positions of T1-T5 as well as the lack of interpretable record below T13. Further work on these cores is needed to fully assess their contribution to the stratigraphic record in the Holocene. On the continental slope and abyssal plain, several University of Washington (UW) cores bear on this issue. In Quinault Channel, UW core TT53- 018 is located in the proximal upper slope reach of Quinault channel, which feeds Willapa Channel. UW cores TT63-17, and TT53-14 lie in a mid-slope basin fed by Quillayute Channel (Barnard, 1973). Age control for these cores is presently limited to the Mazama ash, a few bulk radiocarbon ages, and the Holocene Pleistocene faunal boundary (see discussion of this stratigraphic marker in Goldfinger et al., 2012), but these cores are nevertheless quite valuable. CT data and the available age control suggest that these cores are compatible with the M9907 cores in Juan de Fuca Channel. The total number of major turbidites above the Mazama Ash, with one exception is the same as JDF channel, supporting the original assertion of Adams (1990) that various depocenters on the Washington margin contained 13 turbidites above the Mazama ash. Unique depositional patterns for each turbidite can be traced between cores, supported by the Mazama ash datum, to establish a consistent stratigraphic framework among the five UW and two OSU cores. Our preliminary examination suggests that 3-5 persistent thin beds are found in Quinault and Willapa Channels (TT53-18PC) and 1-2 in the slope basin sampled by cores TT63-17 and TT53-14. These beds may be correlable between sites, suggesting earthquake origin, however further work will be required to test this hypothesis. These beds do not appear be correlated further along strike, though that cannot be ruled out. Considering the preliminary analysis, these data are consistent with Adams (1990) who suggested that this number of smaller local earthquakes might be present along the Washington margin using these same cores, though without the benefit of CT data.

#### 1.4 Astoria Channel

Astoria Channel cores show considerable variability among the eight cores collected multiple channels near the apex of the Astoria Fan (**Fig. 1**). This variability can be attributed to the heterogeneous environment of this region, which is at the head of the Astoria Fan. Like terrestrial fans, this system comprises a number of distributary channel spays that feed the fan. These spays show different levels of recent activity, and most are cut off, leaving them as hanging valleys (though with reversed flow direction) when they are truncated by a more recent channel. Numerous coring attempts were made to establish which of these splays was the most active Holocene distributary channel. The best records were obtained in cores M9907-17PC/TC, and to a lesser extent, M9907-16PC/TC.

Goldfinger et al. (2012) correlate the major turbidites to the regional turbidite series, with the exception of the possible 3-4 beds that are either local turbidites, or the preferred interpretation that they are correlated beds T5b, T8a, T9a and T10a. Using new CT data, we have now also observed an additional sandy-silty turbidite at a position between T15 and T16, similar to the beds observed at that position at JDF and Barkley in core M9907 17PC, the best and most complete of the Astoria cores.

Overall, we found little evidence for locally correlative turbidites affecting the northern Cascadia margin. One possible exception is the bed located between T15 and T16, formerly though to be part of T16. The persistent appearance of a bed at the same stratigraphic position at three sites suggests that may be a correlated bed, though the evidence is not unequivocal. Further work will be required to determine with more confidence whether this bed is separate from the waning stages of the underlying T16 turbidite. Using the methods of Goldfinger et al. (2012), we estimate an age of ~8600 +/- 170 cal BP, assuming the hemipelagic thickness overlying T16 is not a coring artifact in core M9907-12PC**.** At the same stratigraphic position at Hydrate Ridge, we do not observe a turbidite, thus this bed is either the sole example of a correlated bed limited to the northern margin, or it is actually a more widespread regional bed that is more robust in the north (similar to T12). In that case, evidence of an additional regional turbidite is simply absent for some reason at Hydrate Ridge. We observe very limited evidence for other mud turbidites in Washington slope cores. This conclusion is presented here in preliminary form because although the newly gathered data await further analysis, the observations concerning presence or absence of additional thin beds do not require precise age control. The number of additional Holocene turbidites is limited to three or four at most, supporting the original conclusion of Goldfinger et al. (2012) that the northern Cascadia margin turbidite record has at best limited and possibly no evidence for segmented northern ruptures.

### 2.0 Evidence for Earthquakes Younger Than AD 1700

Southern Cascadia cores have 1-3 turbidites overlying the likely turbidite associated with the AD 1700 earthquake. These beds have evidence of excess Pb210 activity, indicating an age < 150 years, and the uppermost of them contain bomb carbon contamination, indicating ages younger than AD 1952. In Rogue Apron cores, T1 (likely AD 1700) appears in most cores directly on top of T2, with hemipelagic material separating them evident only in the Kasten core. Above T1, there is one bed, and possibly two at the surface, separated by several cm of hemipelagic material. This observation is consistent across M9907-30 and 31TC, M9907-32 BC and TN0909-01TC. In TN0909-06TC, there is a clear hemipelagic interval overlying the T1/T2 pair. Overlying that is a weak silty interval, overlain by two silty sandy pulses that may or may not have hemipelagic sediment between them. This upper interval could represent one or several separate events. The upper two intervals both have bomb carbon contamination (**Fig. 8**). The upper part of TN0909-05TC is too bioturbated to interpret clearly, but appears to have on surface silt interval. Core TN0909-07JC clearly shows three turbidites above T1, two silty-sandy, and one muddy. Trinidad core 35TC in the Trinidad Plunge Pool also has very clear evidence of three turbidites overlying the event dated as T1, with clear hemipelagic sediment between them. The two upper beds are thick, sandy silty beds. The uppermost bed is at the seafloor (assuming no loss at the top of the TC), and has a sharp, irregular and likely eroded base. The second unit down is ~ 10 cm thick, with sharp upper and lower contacts. 1 cm of hemipelagic separates this bed from and underlying mud turbidite, which is in turn underlain by 2-4 cm of hemipelagic sediment, and then by the two-pulse T1 turbidite. All three beds are also evident in core M9907-37TC.

The post AD 1700 turbidites evident in multiple cores between Rogue Apron and Trinidad Canyon suggest that three significant turbidity currents were triggered in the last ~ 300 years. All three are younger than ~ 150 years, and the uppermost one was deposited since AD 1952. Possible candidates for triggering events include the largest known historic earthquakes in the region, of which there are ~ 8 candidates of M=7 or greater: 1) the 1873 Brookings M~ 7.3 earthquake which was the strongest historic earthquake in the region (stopping clocks in Sacramento) and most likely occurred on the plate boundary (Wong, 2005; Bakun, 2000); 2) the M 7+ earthquake, possibly on the Mendocino Fault in 1878 (Bakun, 2000); 3) the 1898 earthquake of M=~ 7 offshore northern California (Bakun, 2000); 4) the M = 7.9 1906 San Andreas earthquake (Song et al., 2008); 5) the M= 7.3 Gorda earthquake in 1922 (Ellsworth, 1990); 6) the M=7.2 plate boundary (?) earthquake of 1923 near Petrolia (Ellsworth, 1990); 7) the 1980 Mw = 7.3 Gorda earthquake (Ellsworth (1990); 8) the 1992 Petrolia earthquake (Oppenheimer et al., 1993), and unknown earthquakes prior to settlement. Other sources could include the great storm of 1964 and possible predecessors. Core M9907-51PC in Mendocino Channel has 8 post AD 1700 turbidites which could be consistent with recording many of these earthquakes plus the penultimate Northern San Andreas event at ~ 1720 AD (Goldfinger et al., 2012). We suspect that the three young turbidites in the Rogue-Trinidad cores represent the three strongest earthquakes on or near the plate boundary, potentially those of 1873, 1923 or 1906, and 1992; though more analysis is required to narrow the age ranges of the three turbidites. That all three beds are less than ~ 150 years old indicates that all of the post AD 1700 turbidity currents were triggered in the most recent 150 years of the current seismic cycle, and none in the first 150 years of that cycle. If the triggering events were indeed earthquakes and not related to other sources, this change in frequency might be related to the “stress shadow” of the AD 1700 earthquake.

### 3.0 Slope Stability Assessment

Goldfinger et al. (2012) estimate Mw for the segmented southern Cascadia ruptures to be in the range of 7.5 to 8.7, using strike length estimates based on the turbidite correlations offshore, and other geophysical constraints (thermal, geodetic and GPS) to develop reasonable estimates of slip geometry. While the assumptions made are too unconstrained to provide credible values of Mw, the calculation provides a general estimate of magnitude, and a comparative estimate of relative magnitude between events, assuming the along strike correlations are correct. Slip values were taken from plate convergence and interevent time, assuming full stress drop. This likely overestimates Mw, as does the assumption of a uniform slip plane, but no other information regarding coupling ratio or slip patterns is presently available. Goldfinger et al. (2013) estimate a time series of stored energy from previous cycles, however extraction of seismic moment from such an analysis remains untested. The range of Mw estimated for the southern Cascadia ruptures estimated in this way ranged from 7.5 (T16a), to 8.7 (T5b).

There are no strong ground motion records at ranges as short as the case of submarine canyon heads directly above the plate interface. There are a variety of ground motion prediction equations that have been proposed for various types of faults. This is an active area of research, and observations at very short ranges are very sparse. Expected Peak Spectral Accelerations (PSA) and Peak Ground Acceleration (PGA) have been estimated for subduction earthquakes of Mw = 8.0 as 0.1-1.0g (O.5-10 Hz), and 0.3g for soil sites at ranges of 10-20 km (Atkinson and Boore, 2003). More recently compilations that make use of the strong motion data from the 2011 Tohoku earthquake have provided improved estimates. For example, a study commissioned by BCHydro attempted to summarize and improve on current published estimates. Their GMPE for forearc sites at a range of 25 km yields PSA of 0.9g at ~ 0.17 Hz, similar to the model of Zhao et al., (2006). Given the very short hypocentral distances of ~ 5-15 km (Trehu et al. 2012), acceleration may saturate at very short ranges (Towhata 2008 and references therein, Boore et al., 1997) this we do not assume values would be higher at shorter ranges.

If we estimate slope stability from earthquakes similar to the range of Mw estimated for southern Cascadia ruptures, we can then evaluate whether estimated accelerations would be sufficient to trigger widespread failures required to satisfy the turbidite evidence. There are numerous methods for assessing slope stability, and an in depth analysis is beyond the scope of this paper. To apply a simple screening approach to the problem, we apply a simple vertical slice limit equilibrium approach (also known as pseudostatic), using search methods to locate the critical slip surface for a given slope. We used probabilistic (probability of failure) analyses with reasonable ranges of material properties to assess slope stability spread across normal distributions.

A typical variant of the limit equilibrium equation from Morgenstern (1967) modified to include seismic accelerations (i.e. Azizian and Popescu, 2001; Hadj-Hamou, and Kavazanjian 1985) expressed as a “factor of safety’, where a value of 1 is a neutrally stable slope. We calculated stability using four variants of this basic method, both with and without vertical seismic acceleration, using reasonable ranges of physical property data to establish likely stability ranges for settings discussed in this paper. The methods used were Morgenstern-Price (Morgenstern and Price, 1965), a simplified (Bishop, 1955), Janbu corrected (Janbu, 1973) and Spencer (Spencer, 1967), which are averaged in the subsequent sections. These methods are implemented in the stability code *Slide* ("SLIDE 6.0 – 2D Limit Equilibrium Slope Stability Analysis", <http://www.rocscience.com>; Toronto, Canada: retrieved Aug. 10, 2012).

Engineering data from Cascadia sediments is available as input from existing cores and ODP drilling data. Wet bulk densities in the upper part of our cores average ~1.3, with a submerged bulk density then being ~ 0.3. The unit weight is 18 kN/m3, with a saturated unit weight of 26 kN/m3. The angle of internal friction is estimated from upper few meters of IODP hole 1244 at Hydrate Ridge as 32-36° (Tan et al., 2006). Cohesion is averaged from the upper few meters of sediment in cores from the abyssal plain, ridge tops and ponded basins on the central Oregon margin containing both hemipelagic and turbidite sediments, as reported in Hempel (1995). This value is 4-15 kPa. However, these values may not represent uppermost values for typical surficial sediments, as they were obtained after piston coring and some water loss and thus likely represent an upper bound. Johnson et al. (2012) have developed a method for capturing cohesion of the uppermost sediments in situ. Although their study was conducted in Nova Scotia, the methods are likely more accurate for surficial sediments and we consider this an improvement over the local values that are likely biased by sampling effects. Johnson et al. (2012) find in situ values with a mean of ~9 kPa for surficial materials, and we adopt this value, with a maximum upper bound from local core data at 15 kPa based on Hempel (1995). We allow all variables to lie on normal distributions with the reasonable limits described above to fall at the 2 points.

For open slopes in southern Cascadia, the slope of the frontal thrusts ranges from ~ 7-9° in the Rogue Canyon area, to a maximum of ~ 16° in the Trinidad Canyon area. Average slopes for the Rogue and Trinidad lower continental slope are ~ 3.5° and 4.5° respectively. Surface slopes in the mid to upper reaches of Rogue Canyon range from 5-22°.

Assuming no excess pore fluid pressure (hydrostatic), typical surficial sediments on a 5° slope would require ~0.52g horizontal acceleration to reduce the factor of safety below 1 for material at the mean cohesion (9 kPa). If vertical accelerations are considered (our preferred scenario), the accelerations required are ~0.48g in both horizontal and vertical (**Fig. S2**). Using the same physical properties, on a 15 degree slope, failure should occur at a mean of ~0.34g without using the vertical component, and 0.26g with a vertical component. In these simple models, we allow the seismic loadings to increase pore fluid pressure. Excess pore fluid pressure from other sources (e.g. tectonic) are not considered.

Recent GMPE’s Zhao (2006) or the BCHydro study (Abramson, 2012) predict accelerations of ~ 0.4-0.9g at short (10-20 km) ranges for earthquake of Mw 7.0-8.0. At short ranges, the accelerations likely saturate because additional seismic moment is mostly added from increased strike length (Towhata, 2008). Although actual acceleration data are sparse, predicted accelerations are more than adequate to destabilize slopes greater than 5° for typical surficial materials without calling upon excess pore pressure, weak layers, or cohesionless materials. Given these loosely constrained calculations, even the least energetic of the southern Cascadia ruptures should have generated more than sufficient ground motions to cause widespread slope failures in canyon heads and on open slopes along the Cascadia margin in general, and southern Cascadia in particular. Steeper slopes typical of the canyon heads are predicted to fail at hypocentral ranges up to ~ 40 km. Using the same GMPE relations, slab earthquakes of Mw 6.5 and higher should also be capable of destabilizing slopes above ~ 10° at ranges of ~ 30-40 km.

**Supplementary References Cited (not already included in main references)**

Abramson, N., Summary of the BC Hydro GMPE for Subduction Earthquakes, Presentation at USGS GMPE workshop, December 2012. <http://earthquake.usgs.gov/hazards/about/workshops/GMPE2012/WED_PM07_Abrahamson_Dec_12_2012_BCHydroGMPEsm.pdf>

Adams, J.: Paleoseismicity of the Cascadia subduction zone: evidence from turbidites off the Oregon-Washington margin: Tectonics, 9, 569–583, 1990.

Atkinson, G. M. and D. M. Boore: Empirical ground-motion relations for subduction zone earthquakes and their application to Cascadia and other regions, Bull. Seism. Soc. Am. 93, 1703—1729, 2003.

Atkinson, G. M. and D. M. Boore: Erratum: Empirical ground-motion relations for subduction zone earthquakes and their application to Cascadia and other regions, Bull. Seism. Soc. Am. 98, 2567-2569, 2008.

Azizian, A. and Popescu, R., Backanalysis of the 1929 Grand Banks Submarine Slope Failure, *Proc. 54th Canadian Geotechnical Conf.*, Calgary, Alberta, 808-815, 2001.

Bakun, W. H., 2000, Seismicity of California's north coast: Bull. Seism. Soc. Am., 90, 4,797-812, 2000.

Barnard, W. D.: Late Cenozoic sedimentation on the Washington continental slope [PhD Thesis]: University of Washington, 255 p.,1973.

Bishop, A.W.: The Use of the Slip Circle in the Stability Analysis of Slopes, Geotechnique, Great Britain, 5, 1, 7-17, 1955.

Boore, D. M., Joyner, W. B., and Fumal, T. E.: Equations for estimating horizontal response spectra and peak acceleration from western North American earthquakes: A summary of recent work: Seismological Research Letters, v. 68, p. 128-158, 1997.

Carson, B.: Stratigraphy and depositional history of Quaternary sediments in northern Cascadia Basin and Juan de Fuca abyssal plain, northeast Pacific Ocean [Ph.D thesis]: University of Washington, 249 p, 1971.

Ellsworth, W. L.: Earthquake history, 1769–1989, *in* The San Andreas Fault System, California,R. E. Wallace, ed., U.S. Geological. Survey Professional Paper 1515, 153–188, 1990.

Goldfinger, C., Nelson, C.H., Morey, A., Johnson, J.E., Patton, J., Karabanov, E., Gutierrez-Pastor, J., Eriksson, A.T., Gracia, E., Enkin, R., Dallimore, A., Dunhill, G., and Vallier, T.: Turbidite Event History: Methods and Implications for Holocene Paleoseismicity of the Cascadia Subduction Zone, U.S. Geological Survey Professional Paper 1661-F, Reston, VA, U.S. Geological Survey,184p, 64 Figures, 2012.

Goldfinger, C., Ikeda, Y., and Yeats, R.S, and Ren, J..: Superquakes and Supercycles, Seis. Res. Lett., v. 84, no. 1, p. 24-32, 2013.

Hadj-Hamou, T., and Kavazanjian, E.: Seismic stability of gentle infinite slopes. *Jour. Geotech. Eng.,* ASCE, 111, 6, 681-697, 1985.

Hempel, P.: Dewatering of sediments along the Cascadia margin: evidence from geotechnical properties, *in* Carson, B., Westbrook, G.K., Musgrave, R.J., and Suess, E., eds., Proc. ODP, Sci. Results***,***146 (Pt. 1) 257-274, 1985.

Janbu, N.: Slope Stability Computations. Embankment Dam Engineering - Casagrande Volume, R.C. Hirschfeld and S.J. Poulos, eds., John Wiley and Sons, New York, 47-86, 1973.

Johnson, B. D., Barry, M. A., Boudreau, B. P., Jumars, P. A., and Dorgan, K. M.: In situ tensile fracture toughness of surficial cohesive marine sediments, Geo-Marine Lett., 32, 39-48, 2012.

Morgenstern, N.R.: Submarine Slumping and the Initiation of Turbidity Currents: *in* Richards, A.F., ed., Marine Geotechnique, 189-220. Urbana: University of Illinois Press, 1967.

Morgenstern, N.R., and Price, V.E.: The analysis of the stability of general slip surfaces. Géotechnique, 15, 1, 79–93, 1965.

Oppenheimer, D., Beroza, G., Carver, G., Dengler, L., Eaton, J., Gee, L., Gonzalez, F., Jayko, A., Li, W. H., Lisowski, M., Magee, M., Marshall, G., Murray, M., McPherson, R., Romanowicz, B., Satake, K., Simpson, R., Somerville, P., Stein, R., and Valentine, D.: The Cape Mendocino, California, earthquakes of April 1992: subduction at the triple junction: Science, v. v. 261, p. 433-438, 1993.

Song, S. G., Beroza, G. C., and Segall, P. : A Unified Source Model for the 1906 San Francisco Earthquake: Bulletin of the Seismological Society of America, v. 98, no. 2, p. 823-831, 2008.

Tan, B., Germaine, J.T., and Flemings, P.B.: Data report: Consolidation and strength characteristics of sediments from ODP Site 1244, Hydrate Ridge, Cascadia continental margin, in Tréhu, A.M., Bohrmann, G., Torres, M.E., and Colwell, F.S., eds., Proc. ODP, Sci. Results, 204: College Station, TX (Ocean Drilling Program), 1–148. doi:10.2973/odp.proc.sr.204.102, 2006

Towhata, I.: Geotechnical Earthquake Engineering, New York, Springer, Springer Series in Geomechanics and Geoengineering, 684 p, 2008.

Tréhu, A.M., Blakely, R.J., Williams, M.C.: Subducted seamounts and recent earthquakes beneath the central Cascadia forearc, Geology, 40, 103-106, 2012.

Wong, I. G.: Low Potential for Large Intraslab Earthquakes in the Central Cascadia Subduction Zone, Bull. Seis. Soc. Am., 95, 5, 1880-1902, 2005.

Zhao, J. X., Zhang, J., Asano, A., Ohno, Y., Oouchi, T., Takahashi, T., Ogawa, H., Irikura, K., Thio, H. K., Somerville, P. G., Fukushima, Y., and Fukushima, Y.: Attenuation Relations of Strong Ground Motion in Japan Using Site Classification Based on Predominant Period: Bulletin of the Seismological Society of America, v. 96, no. 3, p. 898-913, 2006.

***Figure S1.*** Trends in bed thickness, mass and density, Rogue Apron to Trinidad Plunge Pool. A. Mass per event derived from Gamma density data. Relative mass values are dimensionless and do not represent actual mass of material in the sampled bed (see Goldfinger et al. 2012). B. Bed thickness per event. C. Peak gamma density in the basal sand (grain size proxy) per event. These three measures generally show similar trends, becoming more dense and increasing in grain size and mass southward, with some exceptions discussed in the text. Tables associated with this figure are given in tables S3a, S3b, and S3c respectively.

***Figure S2.*** A. Critical probabilistic slip surfaces on a 5° slope with varying physical properties and seismic accelerations shown in the table below each panel. B. Critical probabilistic slip surfaces on a 15° slope with varying physical properties and seismic accelerations shown in the table below each panel. Accelerations are adjusted to reduce the factor of safety to failure (<1.0). Critical slip surface is shown in green, with associated probabilistic and deterministic values. Square plot above each panel is a map of the poles of rotation of the slip surfaces in each model.

***Figure S3.*** High Resolution version of Figure 8.
