# Supplementary material for: Spatially limited mud turbidites on the Cascadia margin: segmented earthquake ruptures?
Source: Copernicus journal article supplement (doi:10.5194/nhess-13-2109-2013), 2013-08-23
Supplement: Supplementary file 1 [file nhess-13-2109-2013-supplement.zip]

| Supplementary Table 1.            |            |             |           |
|-----------------------------------|------------|-------------|-----------|
|                                   |            |             |           |
| Cascadia Paleoseismicity Cruise   |            |             |           |
| R/V Melville 1999                 |            |             |           |
| Chris Goldfinger, Chief Scientist |            |             |           |
| Core Locations and Depths         |            |             |           |
|                                   |            |             | Water     |
| Core ID                           | Latitude   | Longitude   | Depth (m) |
| M9907-01PC                        | 45 58.7311 | 125 16.9806 | 1763      |
| M9907-02PC                        | 45 57.9970 | 125 17.0887 | 1869      |
| M9907-03PC                        | 45 58.4975 | 125 16.7471 | 1818      |
| <b>M9907-04BC</b>                 | 45 58.5030 | 125 16.7510 | 1813      |
| M9907-05PC                        | 47 37.6461 | 126 20.5062 | 2376      |
| M9907-06PC                        | 48 06.9613 | 126 36.2189 | 2528      |
| M9907-07PC                        | 48 06.2781 | 126 35.5844 | 2505      |
| M9907-08PC                        | 48 14.1040 | 126 42.7710 | 2552      |
| M9907-09PC                        | 48 14.3960 | 126 43.3260 | 2546      |
| M9907-10PC                        | 47 29.5895 | 125 54.1828 | 1471      |
| M9907-11PC                        | 46 46.3720 | 126 04.8670 | 2658      |
| M9907-12PC                        | 46 46.3783 | 126 04.8664 | 2665      |
| M9907-13PC                        | 46 25.9809 | 125 23.9758 | 2255      |
| M9907-14PC                        | 46 15.1301 | 125 56.9189 | 2680      |
| M9907-15PC                        | 46 15.1336 | 125 56.9103 | 2677      |
| M9907-16PC                        | 45 44.6588 | 125 39.8950 | 2323      |
| M9907-17PC                        | 45 30.6990 | 125 44.9740 | 2495      |
| M9907-18PC                        | 45 27.5088 | 125 44.7039 | 2547      |
| M9907-19PC                        | 45 26.1037 | 125 52.6140 | 2567      |
| M9907-20PC                        | 45 22.7817 | 125 43.5268 | 2622      |
| M9907-21PC                        | 45 22.9150 | 126 00.9100 | 2587      |
| M9907-22PC                        | 44 09.6000 | 127 11.4970 | 3208      |
| M9907-23PC                        | 44 09.6023 | 127 11.4970 | 3211      |
| <b>M9907-24BC</b>                 | 44 09.6023 | 127 11.4970 | 3211      |
| M9907-25PC                        | 44 14.7330 | 127 11.4135 | 3205      |
| M9907-26PC                        | 44 06.7783 | 125 50.1230 | 3043      |
| M9907-27PC                        | 44 00.8664 | 125 33.0034 | 3054      |
| M9907-28PC                        | 44 05.4180 | 125 47.7750 | 3029      |
| M9907-29PC                        | 43 58.2280 | 125 23.5679 | 2858      |
| M9907-30PC                        | 42 25.1685 | 125 13.1174 | 3112      |
| M9907-31PC                        | 42 24.5932 | 125 11.9863 | 3107      |
| <b>M9907-32BC</b>                 | 42 24.5916 | 125 11.9888 | 3106      |
| M9907-33PC                        | 41 44.7292 | 125 11.6328 | 3093      |
| M9907-34PC                        | 41 29.5977 | 125 12.3887 | 3118      |
| M9907-35PC                        | 41 05.2309 | 125 01.1744 | 3045      |
| M9907-36PC                        | 41 05.2304 | 125 01.1762 | 3050      |
| M9907-37PC                        | 41 05.0843 | 125 00.9514 | 3049      |
| <b>M9907-38BC</b>                 | 41 05.2302 | 125 01.1756 | 3054      |
| M9907-39PC                        | 40 37.8544 | 124 50.8182 | 2656      |
| M9907-40PC                        | 40 37.3101 | 124 54.1751 | 2675      |
| M9907-41PC                        | 40 44.5927 | 125 23.1285 | 2940      |
| M9907-42PC                        | 40 45.0467 | 125 24.2605 | 2957      |
| <b>M9907-43BC</b>                 | 40 45.0460 | 125 24.2560 | 2934      |
| M9907-44PC                        | 40 31.0422 | 126 58.1289 | 3221      |
| M9907-45PC                        | 40.31.0404 | 126 58.1233 | 3224      |
| <b>M9907-46BC</b>                 | 40 24.9407 | 125 12.4901 | 2578      |
| M9907-47PC                        | 40 25.3191 | 125 15.8993 | 2620      |
| M9907-48PC                        | 39 05.7553 | 124 33.6661 | 3373      |
| M9907-49PC                        | 39 09.2943 | 124 36.8141 | 3332      |
| <b>M9907-50BC</b>                 | 39 09.2912 | 124 36.8135 | 3330      |
| M9907-51PC                        | 40 25.3167 | 125 15.8993 | 2621      |
| <b>M9907-52BC</b>                 | 40 25.3170 | 125 15.9000 | 2617      |
|                                   |            |             |           |
| SAF Paleoseismicity Cruise        |            |             |           |
| R/V Roger Revelle 2002            |            |             |           |
| Chris Goldfinger, Chief Scientist |            |             |           |
| Core Locations and Depths         |            |             |           |
|                                   |            |             | Water     |
| Core ID                           | Latitude   | Longitude   | Depth (m) |

|             |            |             |      |
|-------------|------------|-------------|------|
| RR0207-02PC | 44 38.6806 | 125 15.0006 | 2311 |
| RR0207-56PC | 44 38.66   | 125 15.81   | 2250 |
| RR0207-01KC | 44 40.0239 | 125 17.0616 | 2110 |
| RR0207-55KC | 42 25.169  | 125 13.12   | 3090 |

Supplementary Table 2.

Cascadia Paleoseismicity Cruise  
R/V Thompson 2009  
Chris Goldfinger, Chief Scientist  
Core Locations and Depths

| Core Site   | Date       | Time (on bottom) | Water Depth | Lat deg | Lat min |          | Dec Lat | Lon deg | Lon min |           | Dec Lon   |
|-------------|------------|------------------|-------------|---------|---------|----------|---------|---------|---------|-----------|-----------|
| TN0909-01JC | 9/30/2009  | 1:11:07          | 3085        | 42      | 26.28   | 0.438    | 42.4380 | 125     | 16.63   | 0.2771667 | -125.2772 |
| TN0909-01TC | 9/30/2009  | 1:11:07          | 3085        | 42      | 26.28   | 0.438    | 42.4380 | 125     | 16.63   | 0.2771667 | -125.2772 |
| TN0909-02JC | 10/1/2009  | 17:18            | 3088        | 42      | 3.206   | 0.053433 | 42.0534 | 125     | 17.47   | 0.2911667 | -125.2912 |
| TN0909-02TC | 10/1/2009  | 17:18            | 3088        | 42      | 3.206   | 0.053433 | 42.0534 | 125     | 17.47   | 0.2911667 | -125.2912 |
| TN0909-03KC | 10/1/2009  | 23:23            | 2323        | 42      | 3.206   | 0.053433 | 42.0534 | 125     | 17.47   | 0.2911667 | -125.2912 |
| TN0909-04JC | 10/2/2009  | 9:14             | 1079        | 41      | 46.316  | 0.771933 | 41.7719 | 124     | 57.178  | 0.9529667 | -124.9530 |
| TN0909-04TC | 10/2/2009  | 9:14             | 1079        | 41      | 46.316  | 0.771933 | 41.7719 | 124     | 57.178  | 0.9529667 | -124.9530 |
| TN0909-05JC | 10/2/2009  | 20:18            | 3094        | 41      | 42.0824 | 0.701373 | 41.7014 | 125     | 14.1909 | 0.236515  | -125.2365 |
| TN0909-05TC | 10/2/2009  | 20:18            | 3094        | 41      | 42.0824 | 0.701373 | 41.7014 | 125     | 14.1909 | 0.236515  | -125.2365 |
| TN0909-06JC | 10/3/2009  | 9:09             | 3080        | 41      | 12.93   | 0.2155   | 41.2155 | 125     | 5.812   | 0.0968667 | -125.0969 |
| TN0909-06TC | 10/3/2009  | 9:09             | 3080        | 41      | 12.93   | 0.2155   | 41.2155 | 125     | 5.812   | 0.0968667 | -125.0969 |
| TN0909-07JC | 10/3/2009  | 0:37             | 3033        | 41      | 0.2324  | 0.003873 | 41.0039 | 125     | 2.772   | 0.0462    | -125.0462 |
| TN0909-07TC | 10/3/2009  | 0:37             | 3033        | 41      | 0.2324  | 0.003873 | 41.0039 | 125     | 2.772   | 0.0462    | -125.0462 |
| TN0909-08KC | 10/4/2009  | 5:55             | 3033        | 41      | 0.2329  | 0.003882 | 41.0039 | 125     | 2.77    | 0.0461667 | -125.0462 |
| TN0909-09JC | 10/4/2009  | 19:45            | 2533        | 40      | 42.4065 | 0.706775 | 40.7068 | 124     | 55.1823 | 0.919705  | -124.9197 |
| TN0909-09TC | 10/4/2009  | 19:45            | 2533        | 40      | 42.4065 | 0.706775 | 40.7068 | 124     | 55.1823 | 0.919705  | -124.9197 |
| TN0909-10JC | 10/5/2009  | 4:40             | 2632        | 40      | 35.8241 | 0.597068 | 40.5971 | 124     | 54.329  | 0.9054833 | -124.9055 |
| TN0909-10TC | 10/5/2009  | 4:40             | 2632        | 40      | 35.8241 | 0.597068 | 40.5971 | 124     | 54.329  | 0.9054833 | -124.9055 |
| TN0909-11KC | 10/5/2009  | 11:00            | 2531        | 40      | 42.413  | 0.706883 | 40.7069 | 124     | 55.1722 | 0.9195367 | -124.9195 |
| TN0909-12JC | 10/5/2009  | 0:15             | 2381        | 40      | 26.0915 | 0.434858 | 40.4349 | 125     | 2.1909  | 0.036515  | -125.0365 |
| TN0909-12TC | 10/5/2009  | 0:15             | 2381        | 40      | 26.0915 | 0.434858 | 40.4349 | 125     | 2.1909  | 0.036515  | -125.0365 |
| TN0909-13KC | 10/6/2009  | 22:55            | 3328        | 39      | 9.3051  | 0.155085 | 39.1551 | 124     | 36.8261 | 0.6137683 | -124.6138 |
| TN0909-14JC | 10/7/2009  | 4:02             | 3325        | 39      | 9.306   | 0.1551   | 39.1551 | 124     | 36.8273 | 0.6137883 | -124.6138 |
| TN0909-14TC | 10/7/2009  | 4:02             | 3325        | 39      | 9.306   | 0.1551   | 39.1551 | 124     | 36.8273 | 0.6137883 | -124.6138 |
| TN0909-15JC | 10/7/2009  | 12:54            | 3225        | 39      | 12.3    | 0.205    | 39.2050 | 124     | 30.278  | 0.5046333 | -124.5046 |
| TN0909-15TC | 10/7/2009  | 12:54            | 3225        | 39      | 12.3    | 0.205    | 39.2050 | 124     | 30.278  | 0.5046333 | -124.5046 |
| TN0909-16JC | 10/7/2009  | 23:15            | 3199        | 39      | 4.6464  | 0.07744  | 39.0774 | 124     | 23.2775 | 0.3879583 | -124.3880 |
| TN0909-16TC | 10/7/2009  | 23:15            | 3199        | 39      | 4.6464  | 0.07744  | 39.0774 | 124     | 23.2775 | 0.3879583 | -124.3880 |
| TN0909-17JC | 10/8/2009  | 8:48             | 3050        | 38      | 54.2074 | 0.903457 | 38.9035 | 124     | 18.2011 | 0.3033517 | -124.3034 |
| TN0909-17TC | 10/8/2009  | 8:48             | 3050        | 38      | 54.2074 | 0.903457 | 38.9035 | 124     | 18.2011 | 0.3033517 | -124.3034 |
| TN0909-18JC | 10/8/2009  | 14:39:10         | 3212        | 38      | 57.115  | 0.951917 | 38.9519 | 124     | 20.597  | 0.3432833 | -124.3433 |
| TN0909-18TC | 10/8/2009  | 14:39:10         | 3212        | 38      | 57.115  | 0.951917 | 38.9519 | 124     | 20.597  | 0.3432833 | -124.3433 |
| TN0909-19KC | 10/8/2009  | 23:35            | 3204        | 39      | 4.6457  | 0.077428 | 39.0774 | 124     | 23.2759 | 0.3879317 | -124.3879 |
| TN0909-20BC | 10/9/2009  | 3:55:00          | 3202.7      | 39      | 4.6462  | 0.077437 | 39.0774 | 124     | 23.2776 | 0.38796   | -124.3880 |
| TN0909-21BC | 10/9/2009  | 22:28:45         | 3024        | 39      | 49.2476 | 0.820793 | 39.8208 | 125     | 13.5273 | 0.225455  | -125.2255 |
| TN0909-22JC | 10/10/2009 | 4:57:13          | 3024        | 39      | 49.2737 | 0.821228 | 39.8212 | 125     | 13.6137 | 0.226895  | -125.2269 |
| TN0909-22TC | 10/10/2009 | 4:57:13          | 3024        | 39      | 49.2737 | 0.821228 | 39.8212 | 125     | 13.6137 | 0.226895  | -125.2269 |
| TN0909-23KC | 10/10/2009 | 10:02            | 3023        | 39      | 49.255  | 0.820917 | 39.8209 | 125     | 13.631  | 0.2271833 | -125.2272 |
| TN0909-24GC | 10/10/2009 | 16:13            | 1634        | 39      | 46.6693 | 0.777822 | 39.7778 | 124     | 59.4495 | 0.990825  | -124.9908 |
| TN0909-25KC | 10/11/2009 | 12:49            | 3473        | 39      | 42.447  | 0.70745  | 39.7075 | 125     | 25.248  | 0.4208    | -125.4208 |
| TN0909-26KC | 10/12/2009 | 0:30             | 2654        | 40      | 35.0888 | 0.584813 | 40.5848 | 124     | 58.2946 | 0.9715767 | -124.9716 |
| TN0909-27JC | 10/12/2009 | 14:25            | 979         | 41      | 40.962  | 0.6827   | 41.6827 | 124     | 55.973  | 0.9328833 | -124.9329 |
| TN0909-27TC | 10/12/2009 | 14:25            | 979         | 41      | 40.962  | 0.6827   | 41.6827 | 124     | 55.973  | 0.9328833 | -124.9329 |
| TN0909-28JC | 10/13/2009 | 2:25:48          | 1955        | 43      | 2.0663  | 0.034438 | 43.0344 | 125     | 6.6519  | 0.110865  | -125.1109 |
| TN0909-28TC | 10/13/2009 | 2:25:48          | 1955        | 43      | 2.0663  | 0.034438 | 43.0344 | 125     | 6.6519  | 0.110865  | -125.1109 |

Yellow shading = cores used or mentioned in this study.
