# Supplementary material for: Spatially limited mud turbidites on the Cascadia margin: segmented earthquake ruptures?
Source: Copernicus journal article supplement (doi:10.5194/nhess-13-2109-2013), 2013-08-23
Supplement: Supplementary file 2 [file Supplementary Tables 3a-3b.xlsx]

## Sheet: Table S3a Radiocarbon Ages
Goldfinger et al., 2013, Spatially Limited Mud Turbidites on the Cascadia Margin: Segmented Earthquake Ruptures?
Supplementary Table 3a
R/V Thomas Thompson Turbidite Coring Cruise 2009: RC Sample Data from sites Trinidad north and south
Greyed turbidite number indicates reversed age
										AMS		AMS age, midpoint or mode							2Sigma	2Sigma	Calib	+
	Sample	Cruise	Core	Depth	thickness	Sieved	Date Sent	Foram	UCI or	Age	+	Calib. 6.0	Range	Range	2 sigma	2 sigma	2 sigma	2 Sigma	propagated	propagated	DR	-		+		sample depth	erosion	corrected for	gap corrected	gap corrected			Samp.
Turbidite #	No.	No.	No.	cm.	cm.	63 m	M D Y	Wt.(mg.)	CAMS #	RCYBP	-	BP (1950)	1 sigma	2 sigma	high	low	Error +	Error -	error	error	(yr)	(yr)	D14C	-	sed rate	corr. age	corr. age	"gap"	2sigma -	2sigma +	gap	Channel	No.
T2	SCNSA-8	TN0909	06JC	59-62	3	X	April 2012	.015mgC	107692	1860	150	1071	918 - 1228	731 - 1351	1351	731	280	340	280.165	340.136	348	42	-206.428	13.8911	29.4	1019.98	1019.98	1019.98	679.844	1300.14	0	N. Trinidad	SCNSA-8
T5	SCNSA-9	TN0909	06JC	168-171	3	X	April 2012	.092mgC	107693	2305	30	1508	1426 - 1570	1375 - 1655	1655	1375	147	133	147.314	133.347	348	42	-249.268	2.69075	29.4	1456.98	1456.98	1456.98	1323.63	1604.29	0	N. Trinidad	SCNSA-9
T9c	SCNSA-10	TN0909	06JC	442.5-444.5	2	X	April 2012	.094mgC	107694	4710	45	4507	4410 - 4584	4337 - 4719	4719	4337	212	170	212.496	170.618	348	42	-443.578	2.96707	19.5	4455.72	4455.72	4455.72	4285.1	4668.21	0	N. Trinidad	SCNSA-10
above T1	SCNSA-15	TN0909	06TC	6.0-9.0	3	X	April 2012	.023mgC	107699	-175	50	BOMB CARBON									348	42			17.1							N. Trinidad	SCNSA-15
T3	SCNSA-16	TN0909	06TC	51.5-54.5	3	X	April 2012	.071mgC	107700	1550	50	751	672 - 805	646 - 892	892	646	141	105	141.967	106.295	348	42	-175.292	4.68756	17.1	663.281	663.281	663.281	556.986	805.248	0	N. Trinidad	SCNSA-16
T4	SCNSA-17	TN0909	06TC	82-85	3	X	April 2012	.029mgC	107701	2050	70	1253	1170 - 1331	1058 - 1412	1412	1058	159	195	159.858	195.7	348	42	-225.625	6.15546	17.1	1165.28	1165.28	1165.28	969.58	1325.14	0	N. Trinidad	SCNSA-17
T5b	SCNSA-18	TN0909	06TC	121-124	3	X	April 2012	.067mgC	107702	2400	35	1624	1549 - 1689	1493 - 1781	1781	1493	157	131	157.869	132.04	348	42	-258.17	2.95648	17.1	1536.28	1536.28	1536.28	1404.24	1694.15	0	N. Trinidad	SCNSA-18
T5d	SCNSA-21	TN0909	06JC	216-219	3	X	April 2012	.040mgC	107703	2730	60	2014	1919 - 2106	1825 - 2218	2218	1825	204	189	204.227	189.245	348	42	-200.769	5.82607	29.4	1962.98	1962.98	1962.98	1773.73	2167.21	0	N. Trinidad	SCNSA-21
above T1	SCNSA-22	TN0909	07JC	4.0-7.0	3	X	April 2012	.067mgC	107704	-120	25	BOMB CARBON									348	42			41.5								SCNSA-22
T2	SCNSA-50	TN0909	07TC	51.5-54.5	3	X	Nov. 2012	.10 mg C	117611	1130	30	419	369 - 481	304 - 499	499	304	80	115	80.6584	115.459	348	42	-131.295	2.74617	27.5	364.455	364.455	364.455	248.996	445.113	0	N. Trinidad	SCNSA-50
T3	SCNSA-51	TN0909	07TC	81.5-84.5	3	X	Nov. 2012	.073 mg C	117612	1685	25	878	816 - 931	752 - 984	984	752	106	126	106.498	126.419	348	42	-189.386	2.32072	27.5	823.455	823.455	823.455	697.035	929.952	0	N. Trinidad	SCNSA-51
T5b	SCNSA-55	TN0909	07JC	302.5-305.5	3	X	Nov. 2012	.071 mg C	117609	2715	30	2003	1919 - 2062	1862 - 2128	2128	1862	125	141	125.186	141.165	348	42	-286.656	2.3874	41.5	1966.86	1966.86	1966.86	1825.69	2092.04	0	N. Trinidad	SCNSA-55
T5c	SCNSA-57	TN0909	07JC	341.5-344.5	3	X	Nov. 2012	.023 mg C	117610	2830	80	2138	2039 - 2274	1911 - 2335	2335	1911	197	227	197.118	227.102	348	42	-296.744	6.29646	41.5	2101.86	2101.86	2101.86	1874.75	2298.97	0	N. Trinidad	SCNSA-57
Error propagations used in this spreadsheet
The age model in this spreadsheet models event ages based on the radiocabon ages, accounting to the differences between the sample position in the core, and the base of the turbidite deposit. The model is based on the methods of Bennett (1994). It is an anlytical model similar to "event free" OxCal models (i.e. Ramsey, 2008) but without strict enforecement of linear sedimentation rates. Instead i…
Sample Thickness = +/- 2 mm
Gap = +/- 2 mm
Erosion correction +/- 5 mm			Sed rate +/- 15%
References
Bennett, K.D. 1994. Confidence intervals for age estimates and deposition times in late-Quaternary sediment sequences. The Holocene, 4, 337-348.
Ramsey, C.B., 2008, Deposition models for chronological records: Quaternary Science Reviews, v. 27, p. 42-60.

## Sheet: Table S3b Sed. rates & graphs
Goldfinger et al., 2013, Spatially Limited Mud Turbidites on the Cascadia Margin: Segmented Earthquake Ruptures?
Supplementary Table 3b
Trinidad sed rate calculation				GRAPHS SHOWN AT FAR RIGHT
red text = 14C sample taken		local sed rates used in Trinidad																	Sedimentation rates used in age model:
Interval	TN0909-06TC	TN0909-06JC	TN0909-07TC	TN0909-07JC								06JC			06TC				Core	below T6	T6 and older
above T1	(everything above first dated event)						TN0909		Radiocarbon			Cumulative			Cumulative				06JC	29.4	19.5
density	5	9	10.5	16.5		Turb #	source core	Sample #	Age	err	err	Thickness	err	err	Thickness	err	err		06TC	17.1
logs/image		16		15					0	0	0	0	1.5	1.5	0	1.5	1.5		07JC	41.5
CT	5.5	10	8	10		T1			250	0	0	9	1.5	1.5	5	1.5	1.5		07TC	27.5
mag sus	4.5	8	9	16.5		T2	07TC	SCNSA 50	360	110	80	9	1.5	1.5	5	1.5	1.5
below T1 (cumulative H between T1 and T2)						T3	06TC	SCNSA 16	660	100	140	19	1.5	1.5	11	1.5	1.5
density	0	0	4			T4	06TC	SCNSA 17	1160	190	160	35.5	1.5	1.5	19.5	1.5	1.5
logs/image	0	0				T5	06JC	SCNSA 09	1420	130	150	42	1.5	1.5	24.5	1.5	1.5
CT	0	0	4	3		T5b	06TC	SCNSA 18	1530	130	160	49	1.5	1.5	28.5	1.5	1.5
mag sus	0	0	2			T5c						53.5	1.5	1.5	32	1.5	1.5
Below T2	(everything between T2 and T3					T5d	06JC	SCNSA 21	1960	190	210	53.5	1.5	1.5	32	1.5	1.5
density	7	10	6	8		T6						59.5	1.5	1.5
logs/image		8		11		T7						70	1.5	1.5
CT	5	8	5	4.5		T8						76	1.5	1.5
mag sus	6	13	2	9.5		T9						89.5	1.5	1.5
Below T2a						T9c	06JC	SCNSA 10	4470	170	210	102.5	1.5	1.5
density	3.5		0	3
logs/image		5	0	7
CT	2.5		0	0
mag sus	3.5	6	0	3.5								07JC			07TC
Below T3	(everything between T3 and T4								Radiocarbon			Cumulative			Cumulative
density	8.5	16.5	12.5	20					Age	err	err	Thickness	err	err	Thickness	err	err
logs/image		20		20					0	0	0	0	1.5	1.5	0	1.5	1.5
CT	8.5	17.5	13.5	23		T1			250	0	0	15	1.5	1.5	9	1.5	1.5
mag sus	9	16	12	22.5		T2	07TC	SCNSA 50	360	110	80	18	1.5	1.5	13	1.5	1.5
Below T3 (to T3a)						T3	06TC	SCNSA 16	660	100	140	27.5	1.5	1.5	18	1.5	1.5
density	4.5	7	5.5	8		T4	06TC	SCNSA 17	1160	190	160	50	1.5	1.5	30.5	1.5	1.5
logs/image		6		6		T5	06JC	SCNSA 09	1420	130	150	60	1.5	1.5
CT	4.5	7	5.5	10		T5b	06TC	SCNSA 18	1530	130	160	68	1.5	1.5
mag sus	5	8	5	9		T5c						74.5	1.5	1.5
Below T3a						T5d	06JC	SCNSA 21	1960	190	210	74.5	1.5	1.5
density	0	0	3	6		T6
logs/image	0	0		8		T7
CT	0	0	3.5	7		T8
mag sus	0	0	3.5	7		T9
Below T3b						T9c	06JC	SCNSA 10	4470	4300	4680
density	4	4.5	4	6
logs/image		7		6
CT	4	4.5	4.5	6
mag sus	4	4	3.5	6.5
Below T3c(?)
density	3	5		?
logs/image		7		?
CT	3	6		?
mag sus	4	4		?
Below T4	(everything between T4 and T5)
density	5	7		12
logs/image		7		7
CT	4.5	6		8
mag sus	6	6		10
Below T4a
density	3	4.5		6
logs/image		4.5		7
CT	3	7		5
mag sus	4	4		6
Below T5	everything between T5 and T5a
density	4	6.5		8
logs/image		7		8
CT	3	5.5		7
mag sus	4	8		9
Below T5a
density	core break	0		0
logs/image		0		0
CT		0		0
mag sus		0		0
Below T5b
density	3.5	4.5		6.5
logs/image		4		6
CT	3	4		5
mag sus	3.5	5.5		8
Below T5c
density		0		0
logs/image		0		0
CT		0		0
mag sus		0		0
Below T5d?
density		7.5		7.5
logs/image		6		8
CT		6		6
mag sus		5		4
Below T6
density		7
logs/image		6
CT		4.5
mag sus		5.5
Below T6a
density		8.5
logs/image		3
CT		4
mag sus		4.5
Below T7
density		6
logs/image		5
CT		6
mag sus		5.5
Below T7a
density		0
logs/image		0
CT		0
mag sus		0
Below T8
density		0
logs/image		0
CT		0
mag sus		0
Below T8 (T8 to T8b)
density		8
logs/image		7
CT		8.5
mag sus		6.5
Below T8b (T8b to T9)
density		6
logs/image		5.5
CT		4.5
mag sus		5
Below T9
density		0
logs/image		0
CT		0
mag sus		0
Below T9a
density		5
logs/image		6
CT		5
mag sus		4
Below T9b
density		7.5
logs/image		8
CT		7.5
mag sus		8
