# Supplementary material for: Spatially limited mud turbidites on the Cascadia margin: segmented earthquake ruptures?
Source: Copernicus journal article supplement (doi:10.5194/nhess-13-2109-2013), 2013-08-23
Supplement: Supplementary file 3 [file nhess-13-2109-2013-supplement.zip]

Supplementary Table S3.

Table 3a. Bed thickness, Rogue Apron to Trinidad Plunge Pool

| Bed  | 31PC | 02JC | 33PC | 05JC | 34PC | 06JC | 07JC |
|------|------|------|------|------|------|------|------|
| T1   | 15   | 8    | 8    | 16   | 12   | 14   | 8    |
| T2   | 6    | 14   | 18   | 16   | 12   | 10   | 18   |
| T2a  | 6    | 7    | 12   | 14   | 11   | 5    | 6    |
| T3   | 12   | 12   | 16   | 14   | 20   | 15   | 17   |
| T3a  | 6    | 8    | 8    | 4    | 3    | 12   | 12   |
| T4   | 9    | 14   | 12   | 8    | 10   | 17   | 18   |
| T4a  | 6    | 6    | 4    | 2    | 0    | 4    | 10   |
| T5   | 21   | 18   | 12   | 10   | 10   | 20   | 23   |
| T5a  | 6    | 8    | 3    | 4    | 6    | 7    | 8    |
| T5b  | 6    | 8    | 4    | 8    | 6    | 9    | 22   |
| T5c  | 6    | 6    | 8    | 6    | 8    | 9    | 15   |
| T6   | 12   | 9    | 14   | 12   | 14   | 10   |      |
| T6a  | 4    | 2    | 0    | 0    | 0    | 7    |      |
| T7   | 18   | 8    | 14   | 10   | 9    | 8    |      |
| T7a  | 8    | 8    | 8    | 3    | 0    | 6    |      |
| T8   | 18   | 16   | 24   | 17   | 9    | 18   |      |
| T8a  | 6    | 20   | 20   | 12   | 14   | 8    |      |
| T8b  | 8    | 20   | 16   | 13   | 20   | 23   |      |
| T9   | 14   | 24   | 40   | 16   | 12   | 28   |      |
| T9a  | 10   | 16   | 18   | 10   | 8    | 6    |      |
| T9b  | 10   | 12   | 10   | 4    | 6    |      |      |
| T10  | 13   | 15   | 21   | 12   | 11   |      |      |
| T10a | 6    | 4    | 7    | 3    | 4    |      |      |
| T10b | 17   | 12   | 10   | 8    | 9    |      |      |
| T10c | 6    | 5    | 5    | 7    | 6    |      |      |
| T10d | 13   | 7    | 5    | 5    | 5    |      |      |
| T10e | 0    | 0    | 5    | 4    | 5    |      |      |
| T10f | 20   | 15   | 15   | 6    | 10   |      |      |
| T11  | 23   | 21   | 55   | 25   | 30   |      |      |

Notes:

1) Bed thickness in cm

Table 3b. Mass per event, Rogue Apron to Trinidad Plunge Pool

| Bed  | 31PC  | 02JC     | 05JC   | 06JC     | 07JC   |
|------|-------|----------|--------|----------|--------|
| T1   | 165   | 17.85    | 33.66  | 139.23   | 49.47  |
| T2   | 87    | 57.12    | 94.35  | 73.44    | 91.8   |
| T2a  | 33    | 27.03    | 7.14   | 18.87    | 11.22  |
| T3   | 175.5 | 26.01    | 115.77 | 243.78   | 364.65 |
| T3a  | 24    | 10.2     | 7.14   | 111.18   | 85.17  |
| T4   | 103.5 | 7.14     | 56.61  | 135.1500 | 125.97 |
| T4a  | 25.5  | 20.91    | 0      | 22.44    | 26.01  |
| T5   | 118.5 | 64.77    | 73.95  | 279.99   | 281.52 |
| T5a  | 51    | 8.67     | 30.6   | 49.47    | 64.77  |
| T5b  | 31.5  | 6.63     | 19.38  | 130.05   | 267.75 |
| T5c  | 27    | 12.75    | 15.3   | 131.07   | 202.47 |
| T6   | 79.5  | 29.07    | 64.26  | 51       |        |
| T6a  | 34.5  |          |        |          |        |
| T7   | 127.5 | 13.77    | 41.31  | 65.28    |        |
| T7a  | 28.5  | 16.83    | 17.34  |          |        |
| T8   | 124.5 | 93.84    | 115.77 | 236.64   |        |
| T8a  | 45    | 71.4     | 122.91 |          |        |
| T8b  | 46.5  | 90.27    | 118.83 | 292.74   |        |
| T9   | 129   | 229.5    | 173.91 | 210.63   |        |
| T9a  | 45    | 78.54    | 112.2  | 97.41    |        |
| T9b  |       | 20.91    | 41.31  | 132.6    |        |
| T10  | 201   | 93.84    | 99.96  |          |        |
| T10a | 27    | 13.26    | 10.2   |          |        |
| T10b | 153   | 90.27    | 34.17  |          |        |
| T10c | 33    | 23.46    | 18.87  |          |        |
| T10d | 36    | 26.52    | 26.01  |          |        |
| T10e | 0     | 0        | 15.3   |          |        |
| T10f | 126   | 43.35    | 44.88  |          |        |
| T11  | 447   | 176.9700 | 232.56 |          |        |

Notes:

1) Mass derived from gamma density plots and scaled to match Goldfinger et al. (2012).

Table 3c. Peak density per event, Rogue Apron to Trinidad Plunge Pool

| Bed  | 31PC | 02JC  | 33PC  | 05JC | 34PC | 06JC | 07JC |
|------|------|-------|-------|------|------|------|------|
| T1   | 1.65 | 1.32  | 1.25  | 1.31 | 1.37 | 1.5  | 1.45 |
| T2   | 1.65 | 1.44  | 1.45  | 1.53 | 1.58 | 1.55 | 1.56 |
| T2a  | 1.27 | 1.35  | 1.22  | 1.26 | 1.36 | 1.4  | 1.43 |
| T3   | 1.47 | 1.38  | 1.28  | 1.5  | 1.59 | 1.7  | 1.88 |
| T3a  | 1.28 | 1.35  | 1.22  | 1.32 | 1.37 | 1.54 | 1.62 |
| T4   | 1.47 | 1.4   | 1.26  | 1.42 | 1.57 | 1.65 | 1.7  |
| T4a  | 1.25 | 1.34  | 1.29  | 1.3  | 1.42 | 1.47 | 1.45 |
| T5   | 1.67 | 1.38  | 1.29  | 1.55 | 1.67 | 1.7  | 1.75 |
| T5a  | 1.3  | 1.33  | 1.24  | 1.35 | 1.43 | 1.51 | 1.6  |
| T5b  | 1.3  | 1.35  | 1.24  | 1.35 | 1.43 | 1.7  | 1.82 |
| T5c  | 1.66 | 1.36  | 1.26  | 1.32 | 1.41 | 1.75 | 1.83 |
| T6   | 1.44 | 1.38  | 1.275 | 1.35 | 1.41 | 1.5  |      |
| T6a  | 1.28 |       |       |      |      |      |      |
| T7   | 1.55 | 1.38  | 1.28  | 1.35 | 1.45 | 1.6  |      |
| T7a  | 1.3  | 1.38  | 1.65  | 1.37 |      |      |      |
| T8   | 1.64 | 1.46  | 1.38  | 1.4  | 1.55 | 1.65 |      |
| T8a  | 1.38 | 1.33  | 1.35  | 1.46 | 1.46 | 1.57 |      |
| T8b  | 1.38 | 1.46  | 1.38  | 1.56 | 1.65 | 1.8  |      |
| T9   | 1.67 | 1.6   | 1.44  | 1.61 | 1.7  | 1.77 |      |
| T9a  | 1.3  | 1.349 | 1.39  | 1.55 | 1.57 | 1.75 |      |
| T9b  | 1.35 | 1.45  | 1.38  | 1.48 | 1.56 | 1.76 |      |
| T10  | 1.67 | 1.51  | 1.41  | 1.57 | 1.66 |      |      |
| T10a | 1.32 | 1.44  | 1.32  | 1.4  | 1.48 |      |      |
| T10b | 1.7  | 1.53  | 1.5   | 1.42 | 1.63 |      |      |
| T10c | 1.37 | 1.47  | 1.36  | 1.42 | 1.49 |      |      |
| T10d | 1.36 | 1.48  | 1.33  | 1.42 | 1.61 |      |      |
| T10e | 0    | 0     | 1.31  | 1.41 | 1.59 |      |      |
| T10f | 1.58 | 1.47  | 1.32  | 1.4  | 1.6  |      |      |
| T11  | 1.75 | 1.63  | 1.53  | 1.7  | 1.72 |      |      |

## Notes:

- 1) Peak basal density in g/cc
- 2) T9a and T9b may be combined in 31PC and 30 PC.
- 3) Events below T6 not tracked in 07PC due to lack of age control.
- 4) T6a not observed in 02JC, 33PC, 05JC
- 5) T7a not observed south of Smith Apron, though it may be present in 06 and 07JC.
