# Supplementary figures and images for: Spatially limited mud turbidites on the Cascadia margin: segmented earthquake ruptures?
Source: Copernicus journal article supplement (doi:10.5194/nhess-13-2109-2013), 2013-08-23

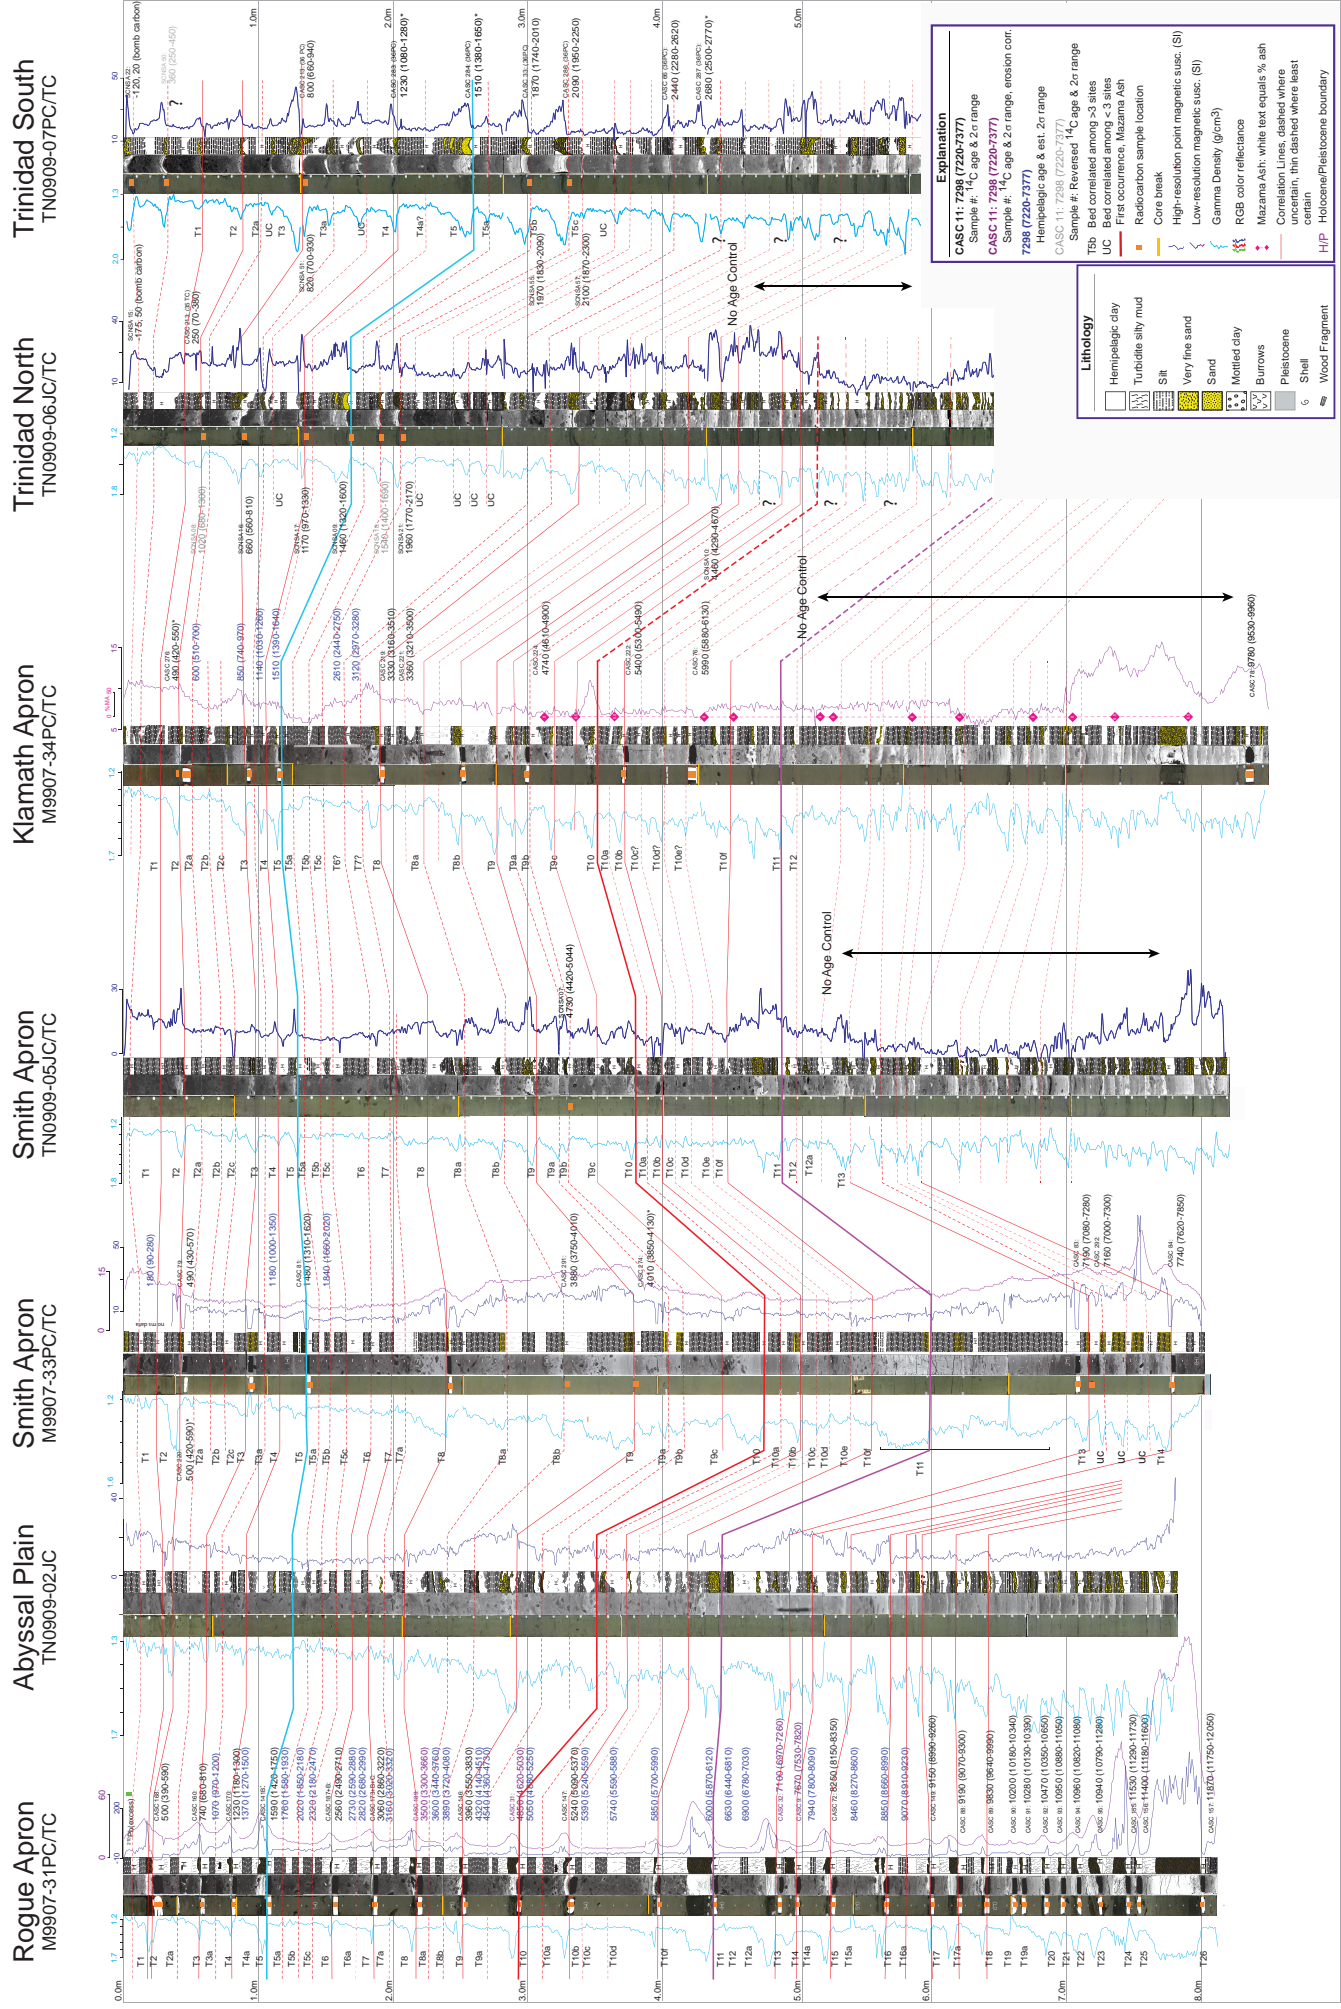

Supplement: Supplementary file 2 [file nhess-13-2109-2013-supplement.zip]
